# Supplementary material
Source: PubMed Central journal article supplement (PMC4447299)
Supplement: NIHMS688719-supplement-supplement_1.pdf [file NIHMS688719-supplement-supplement_1.pdf]

Osteogenic

Adipogenic

Chondrogenic

Control

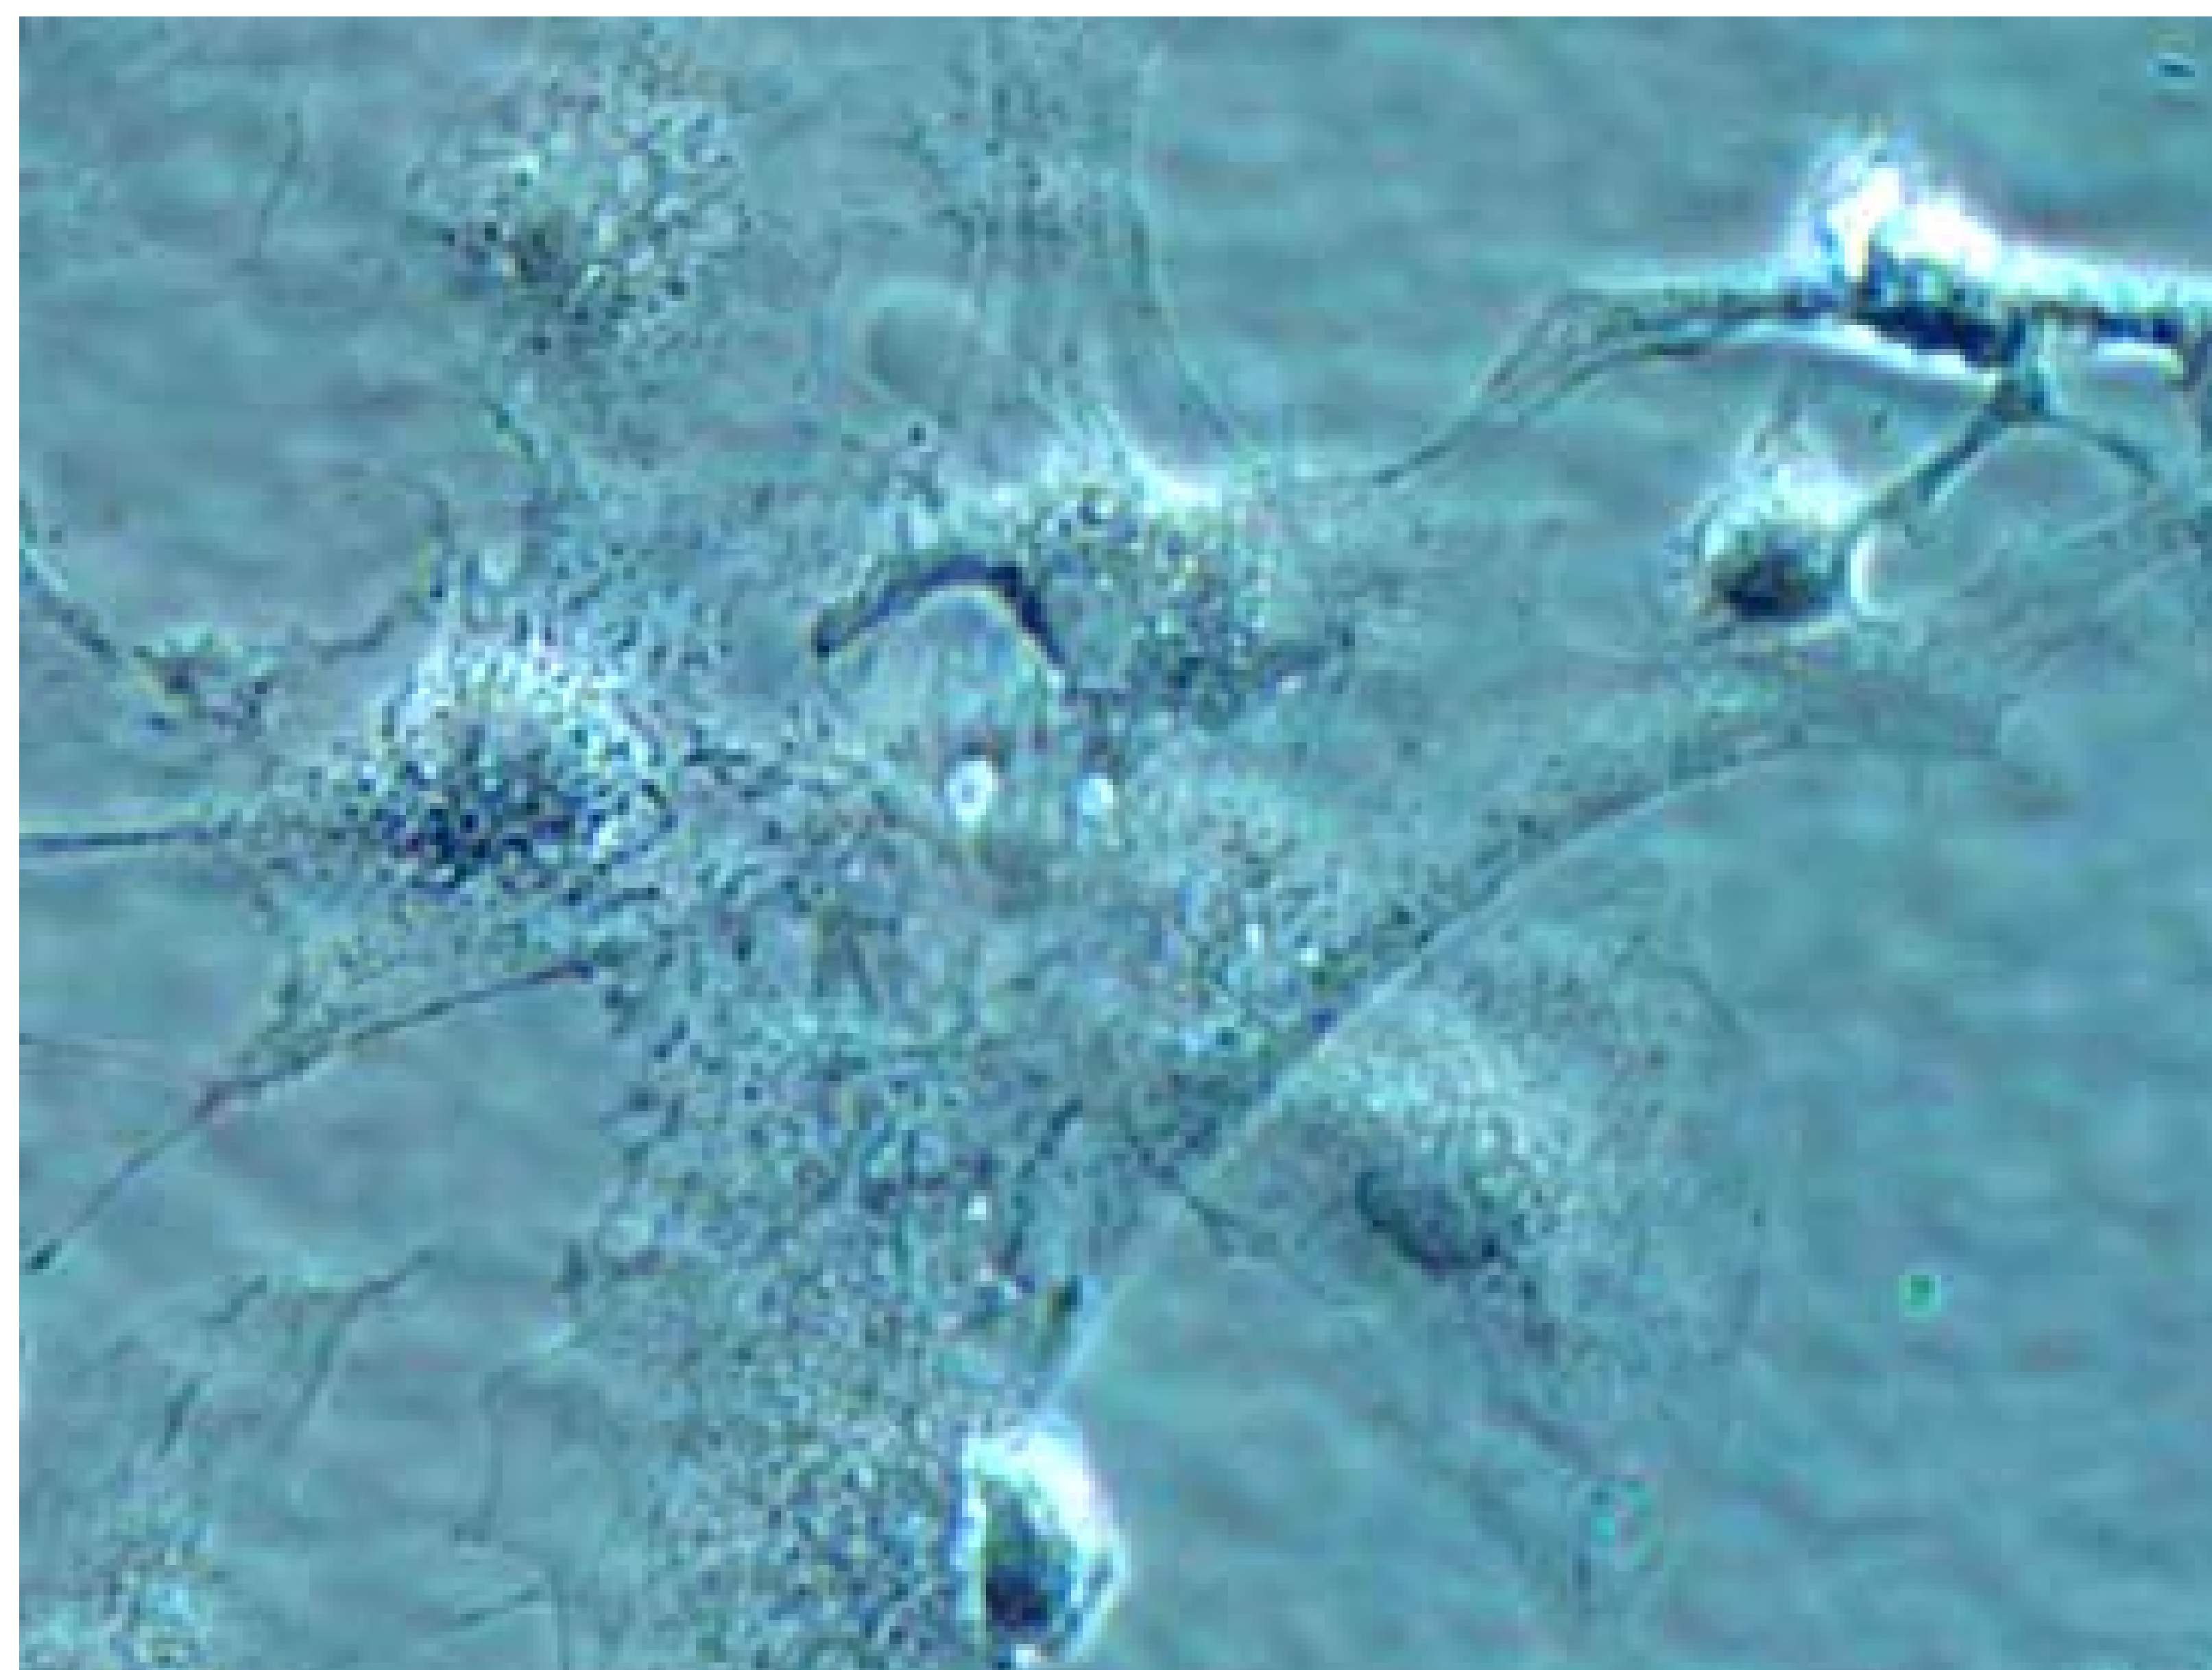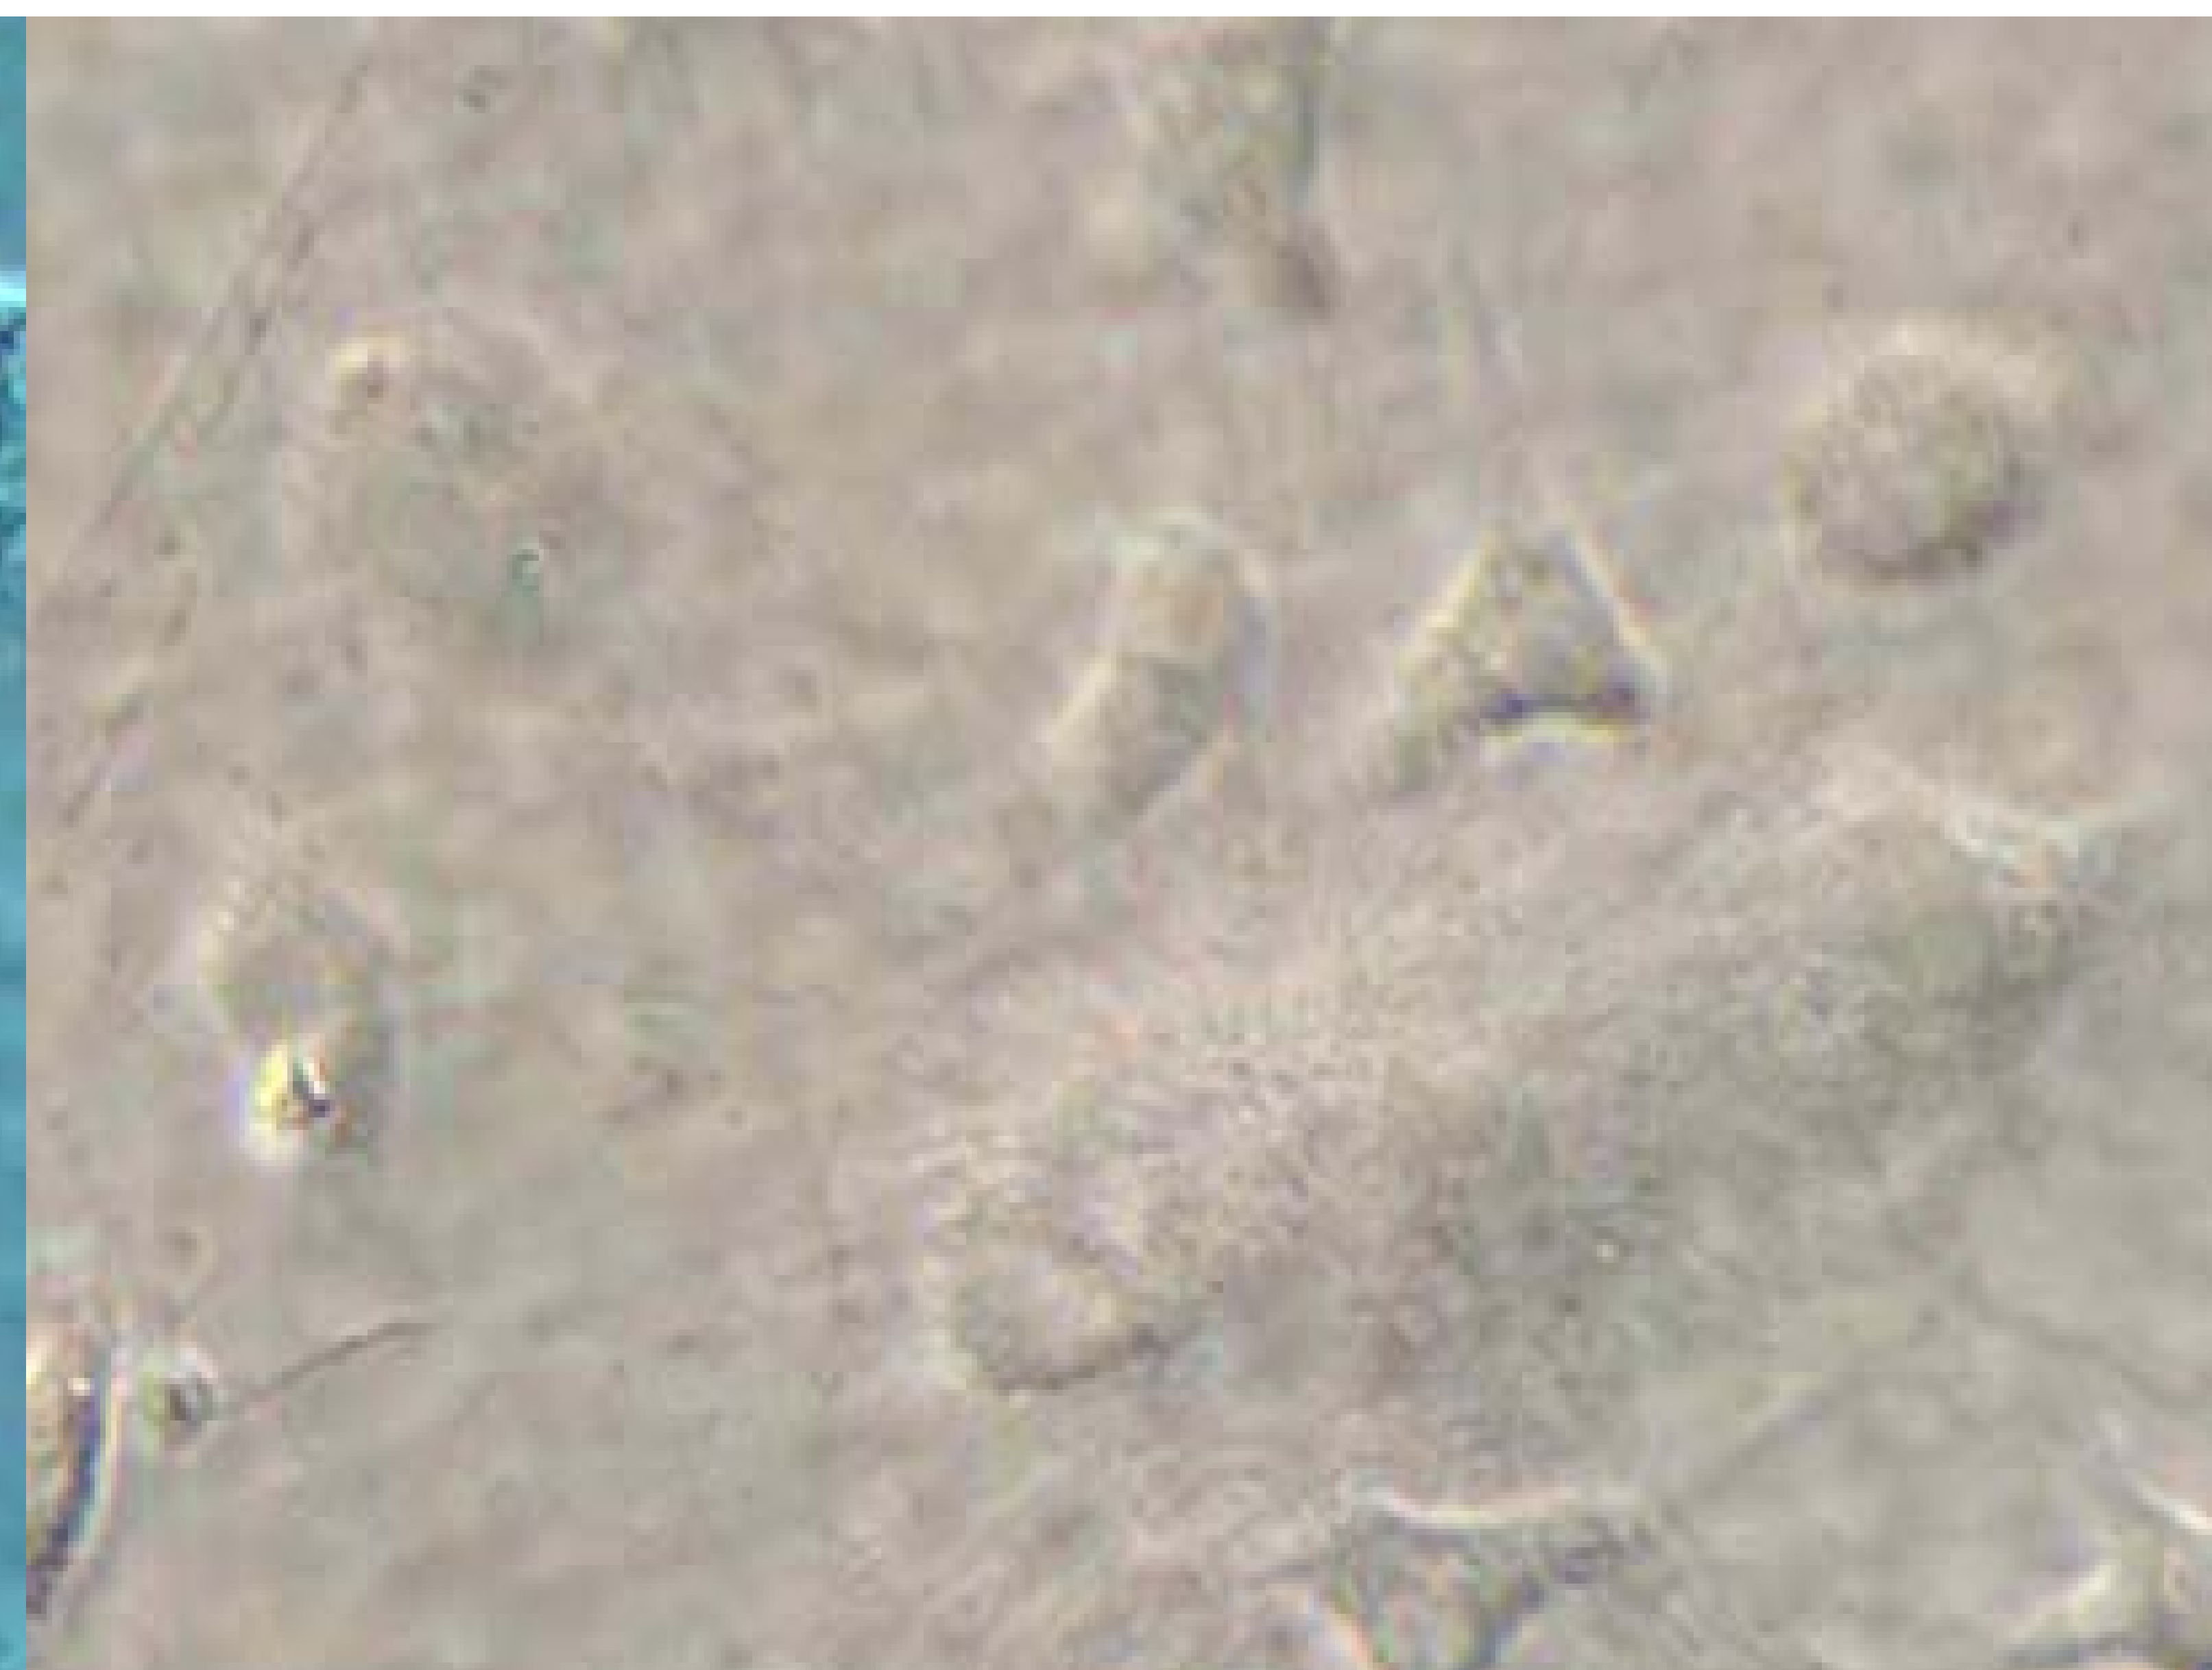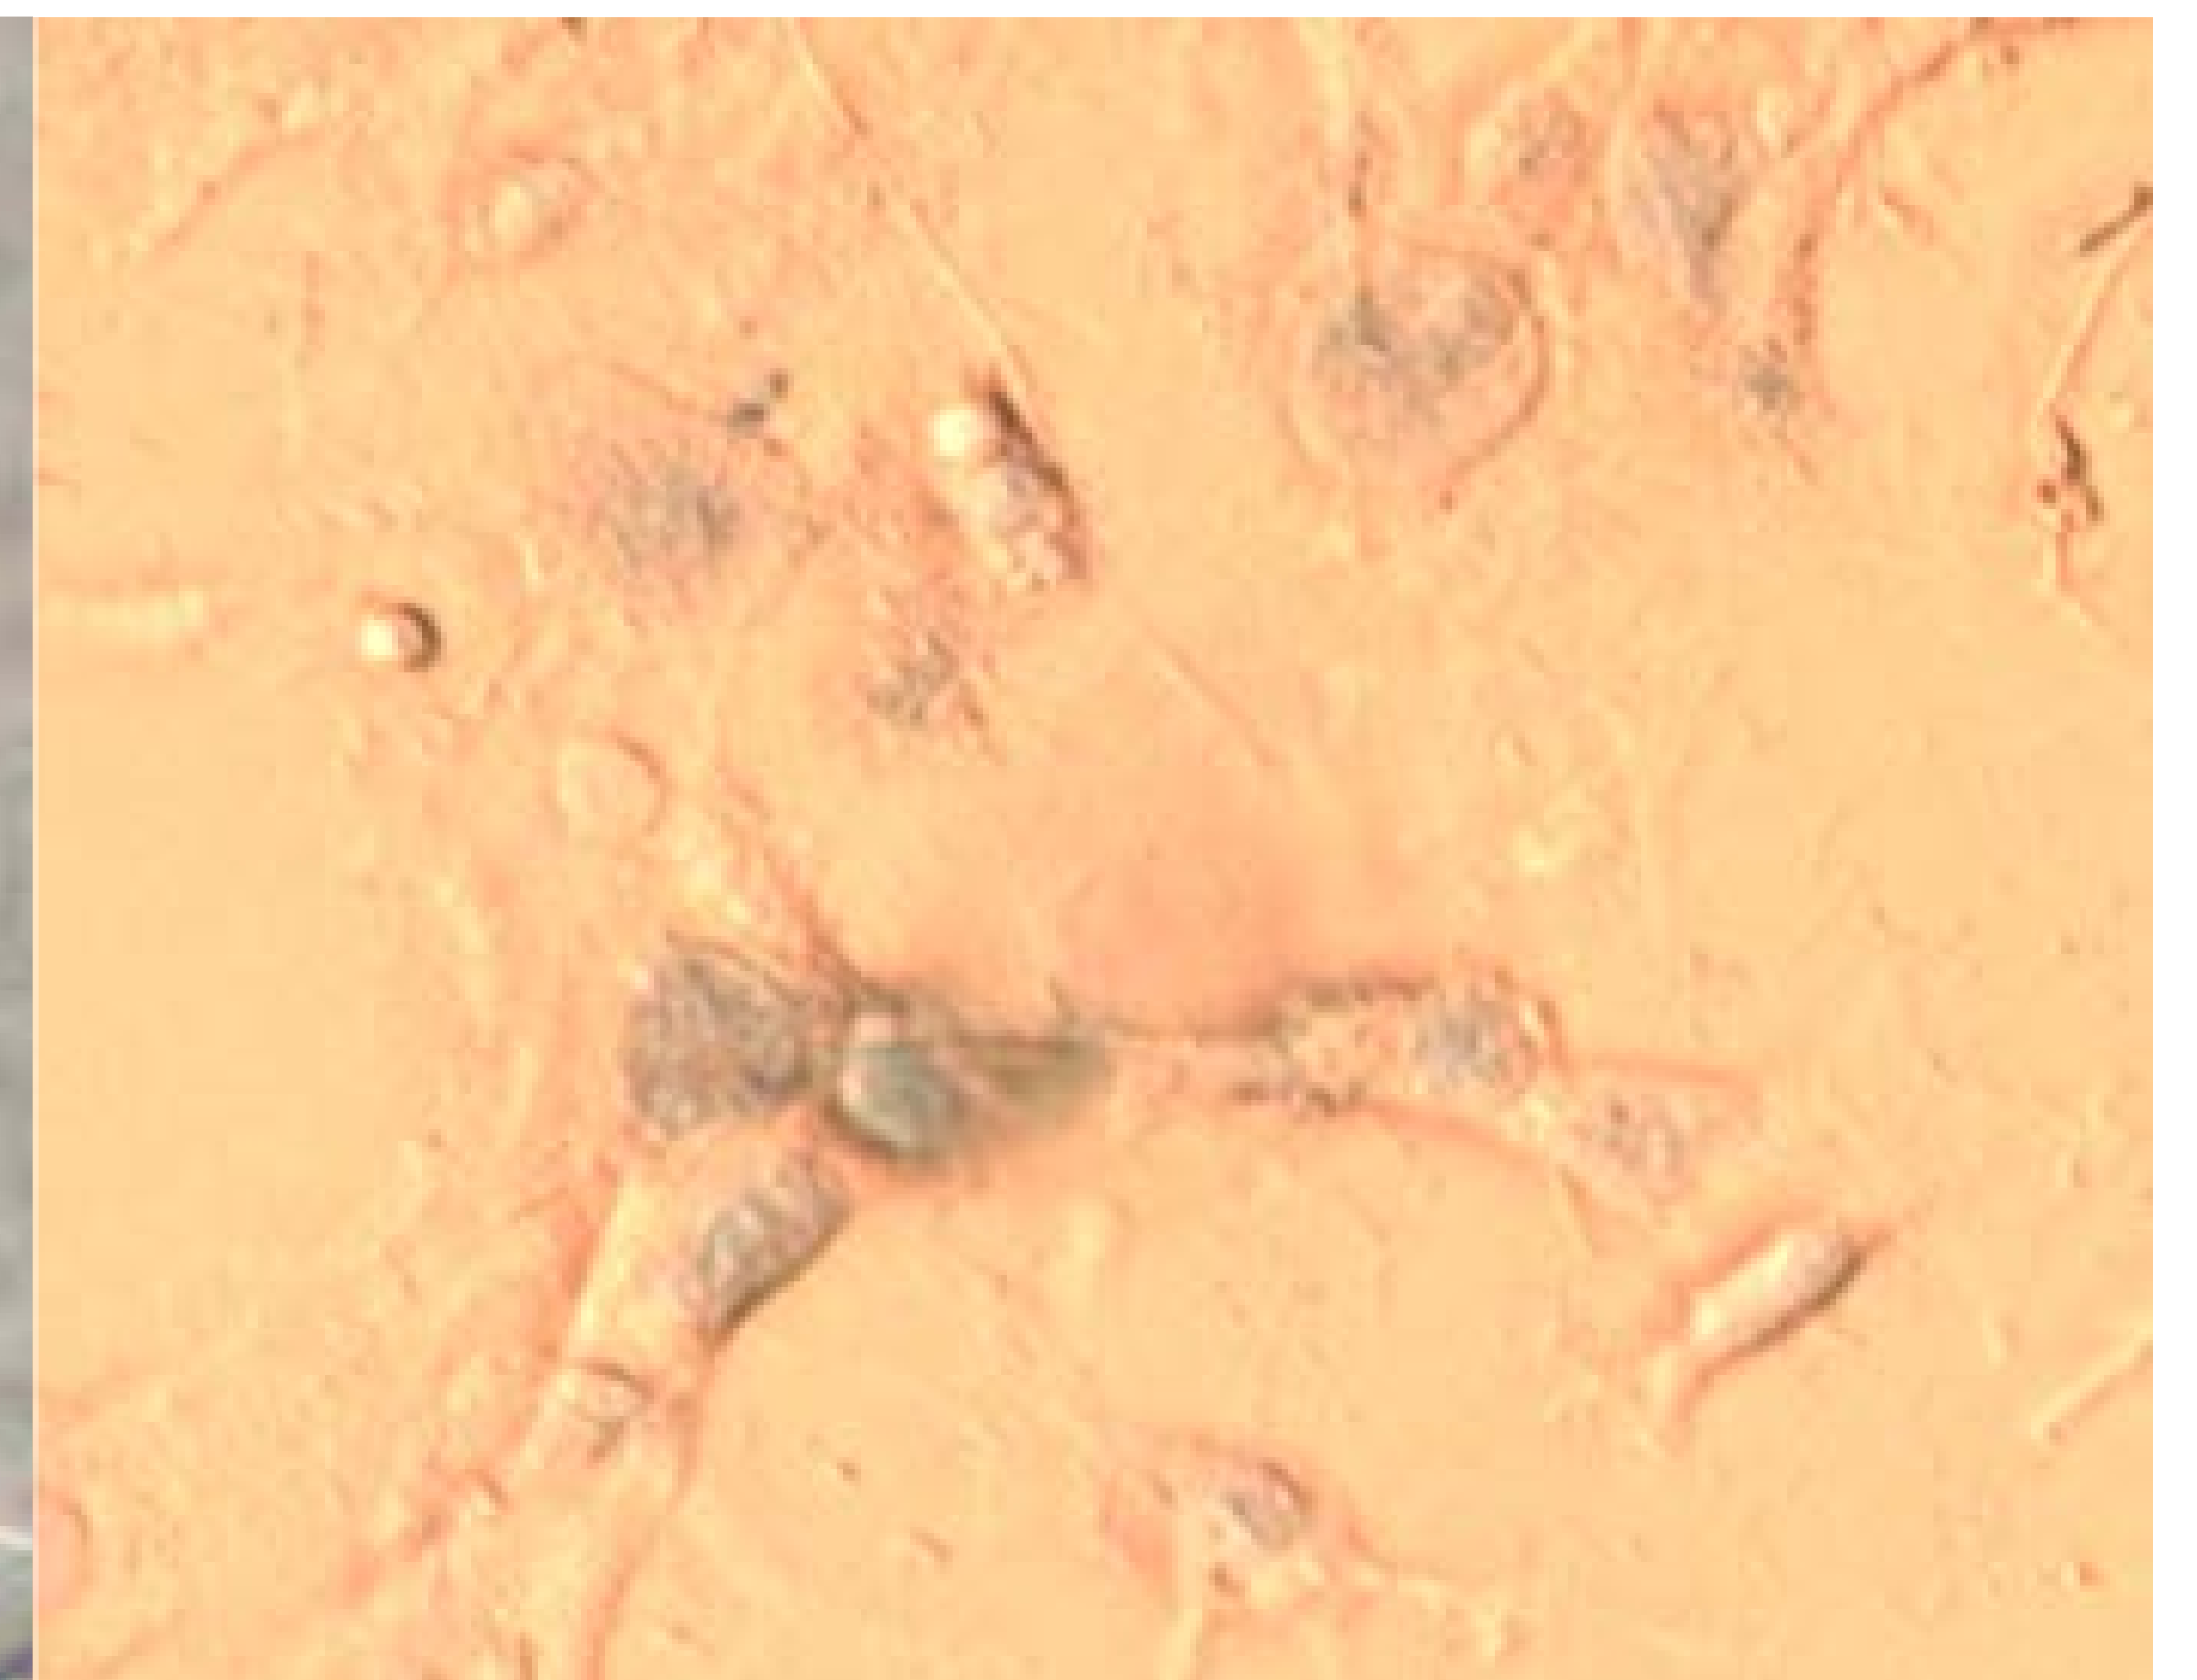

Differentiated

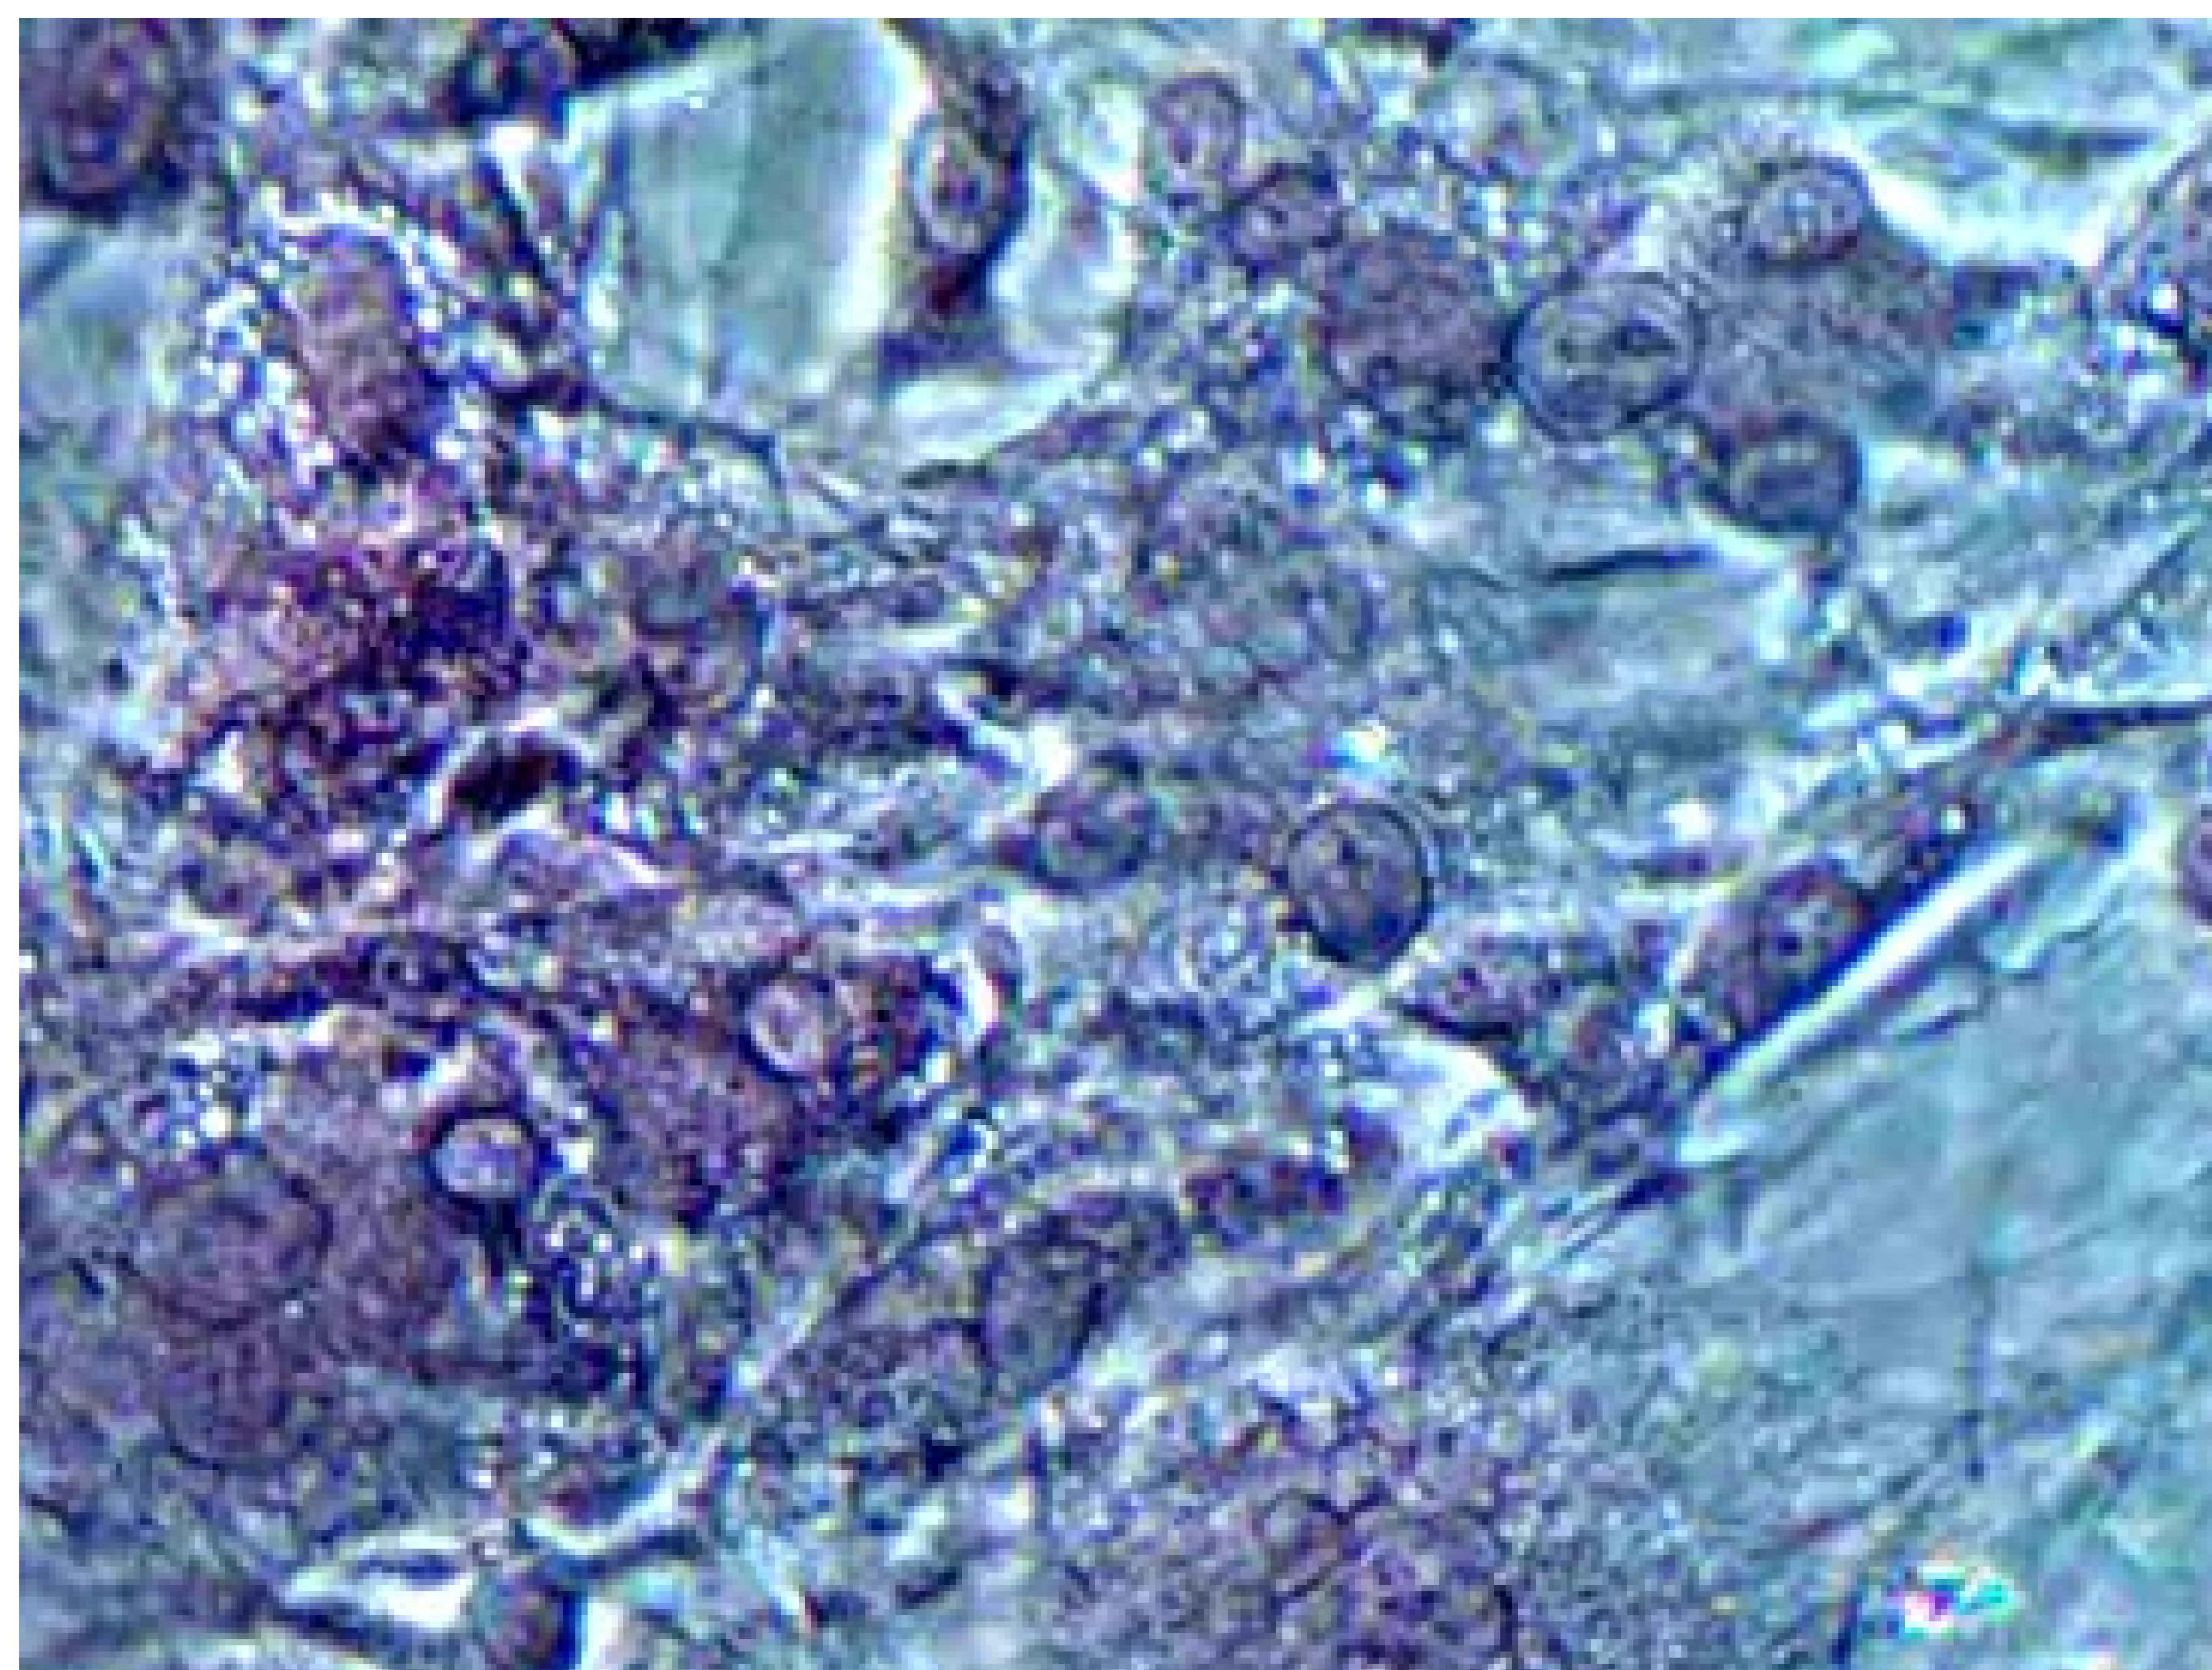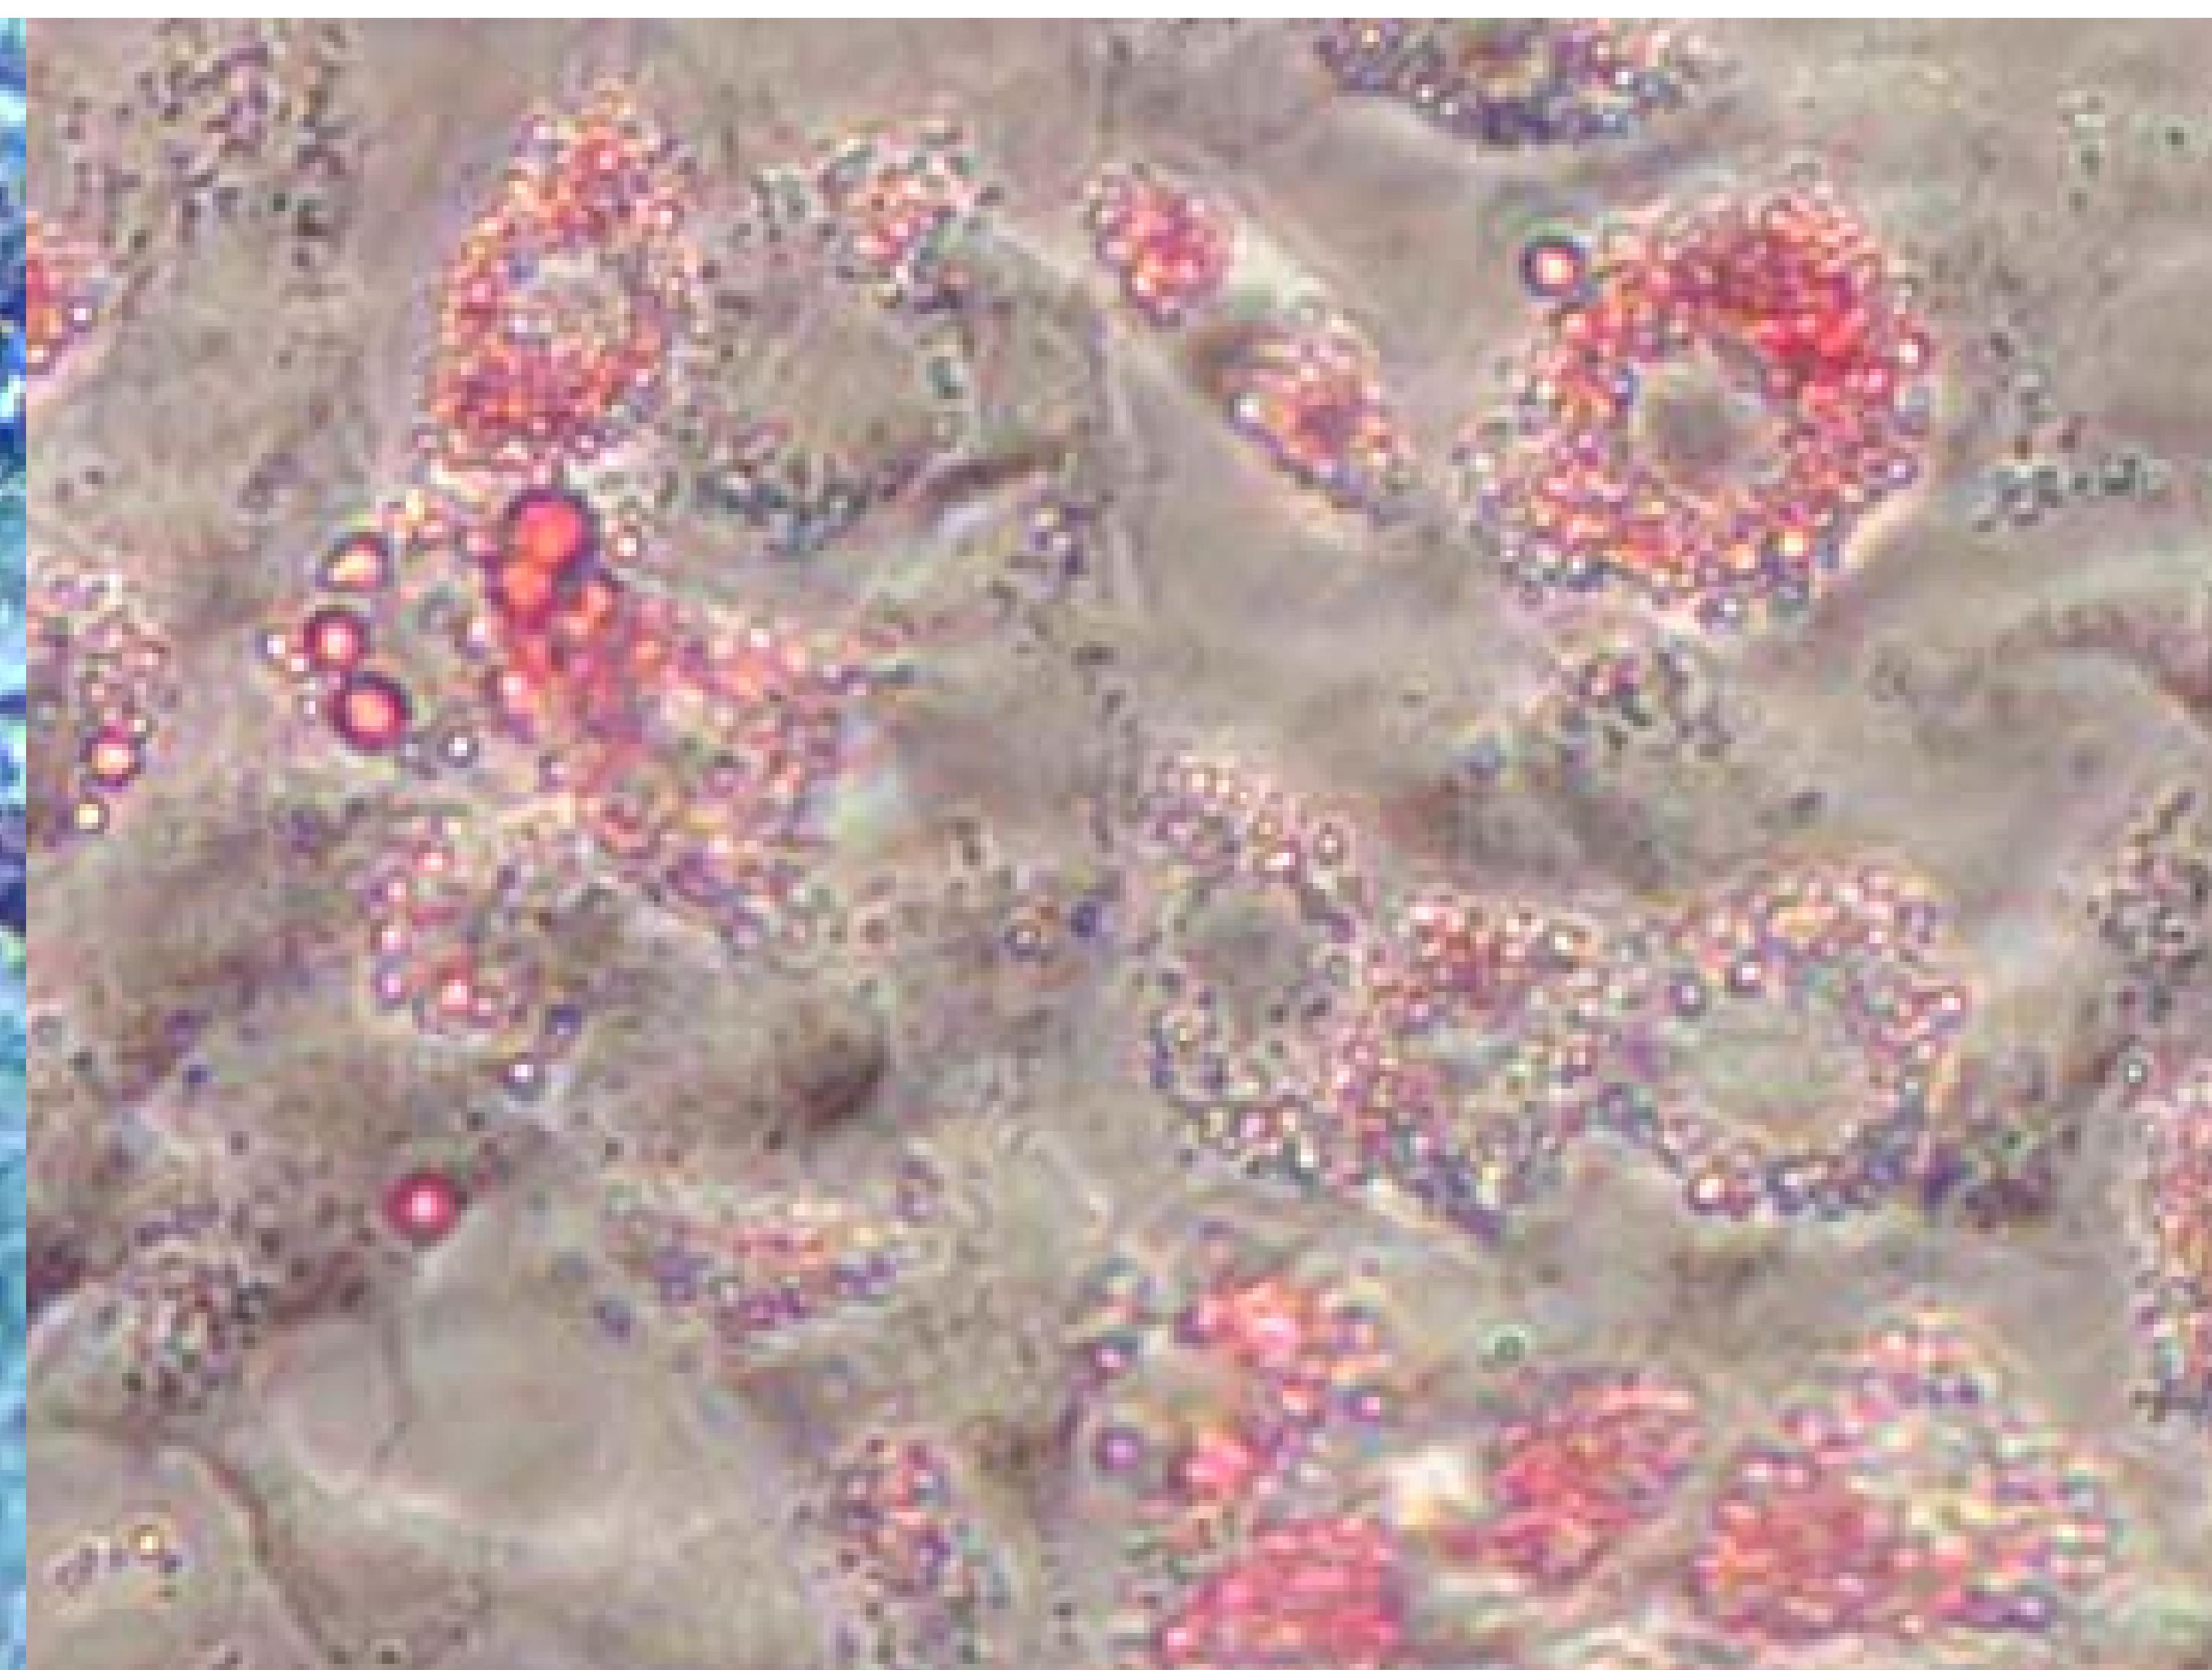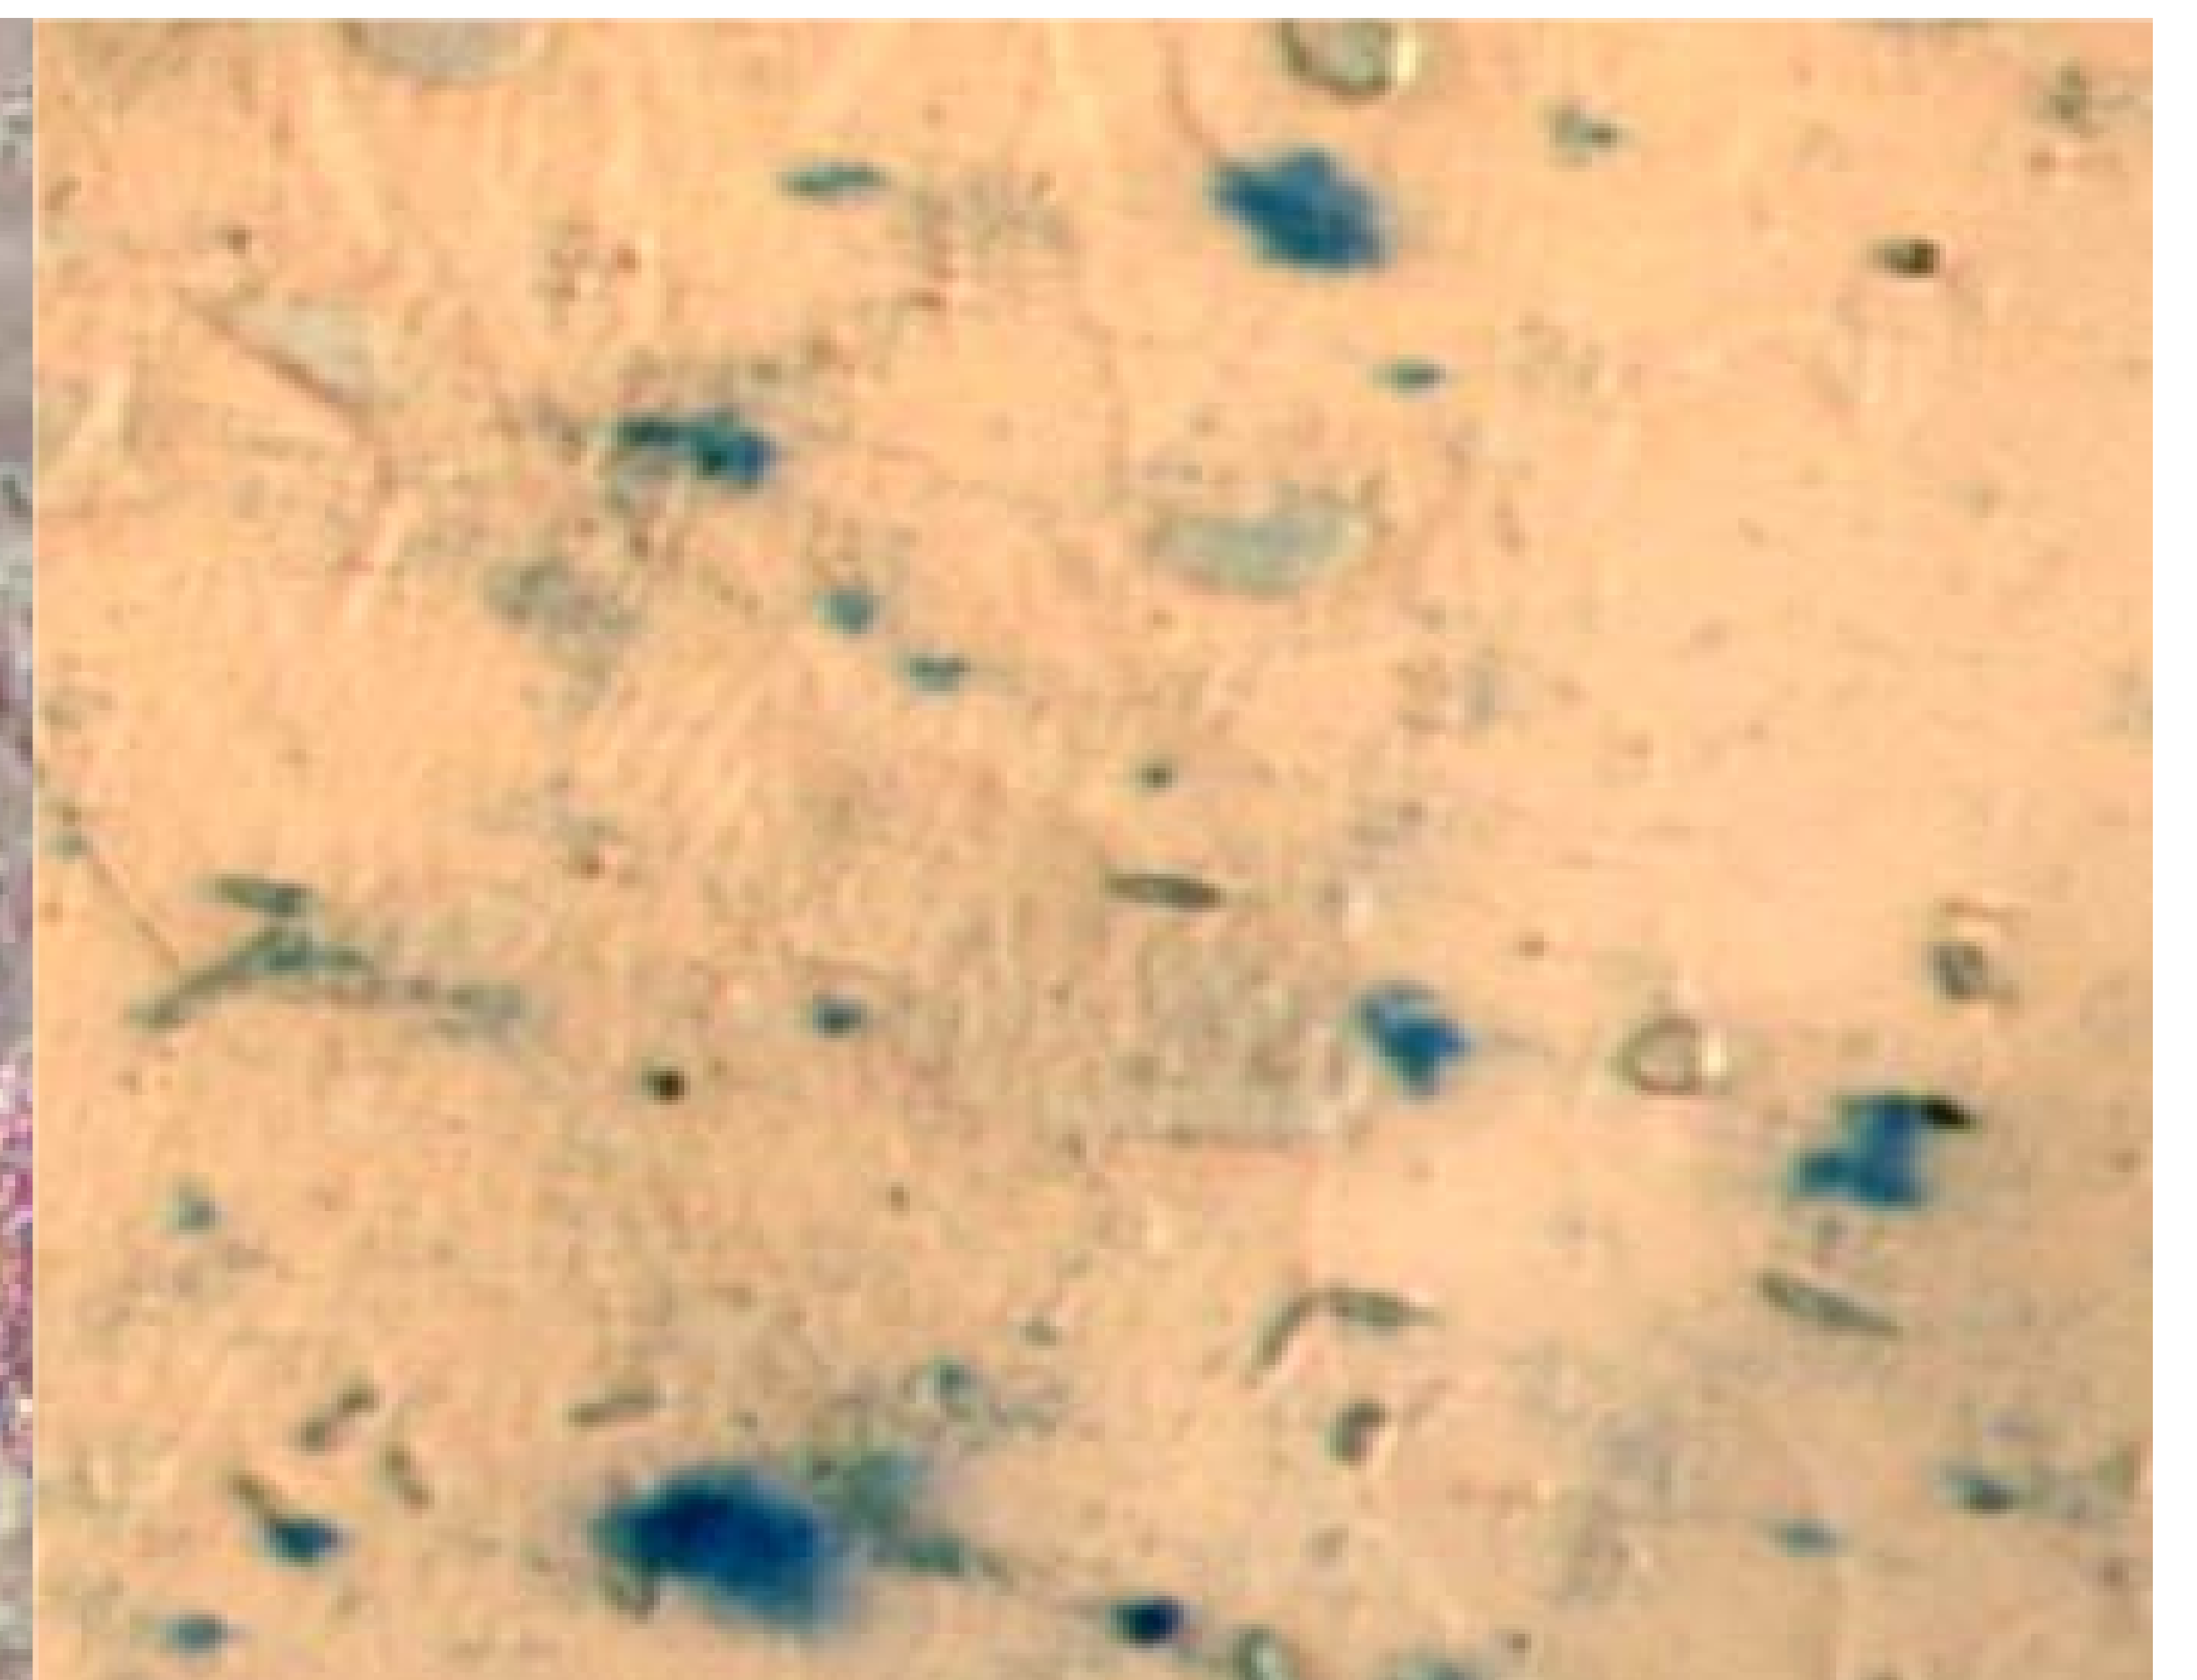

Alizarin Red

Oil Red

Alcian Blue

# HECA452

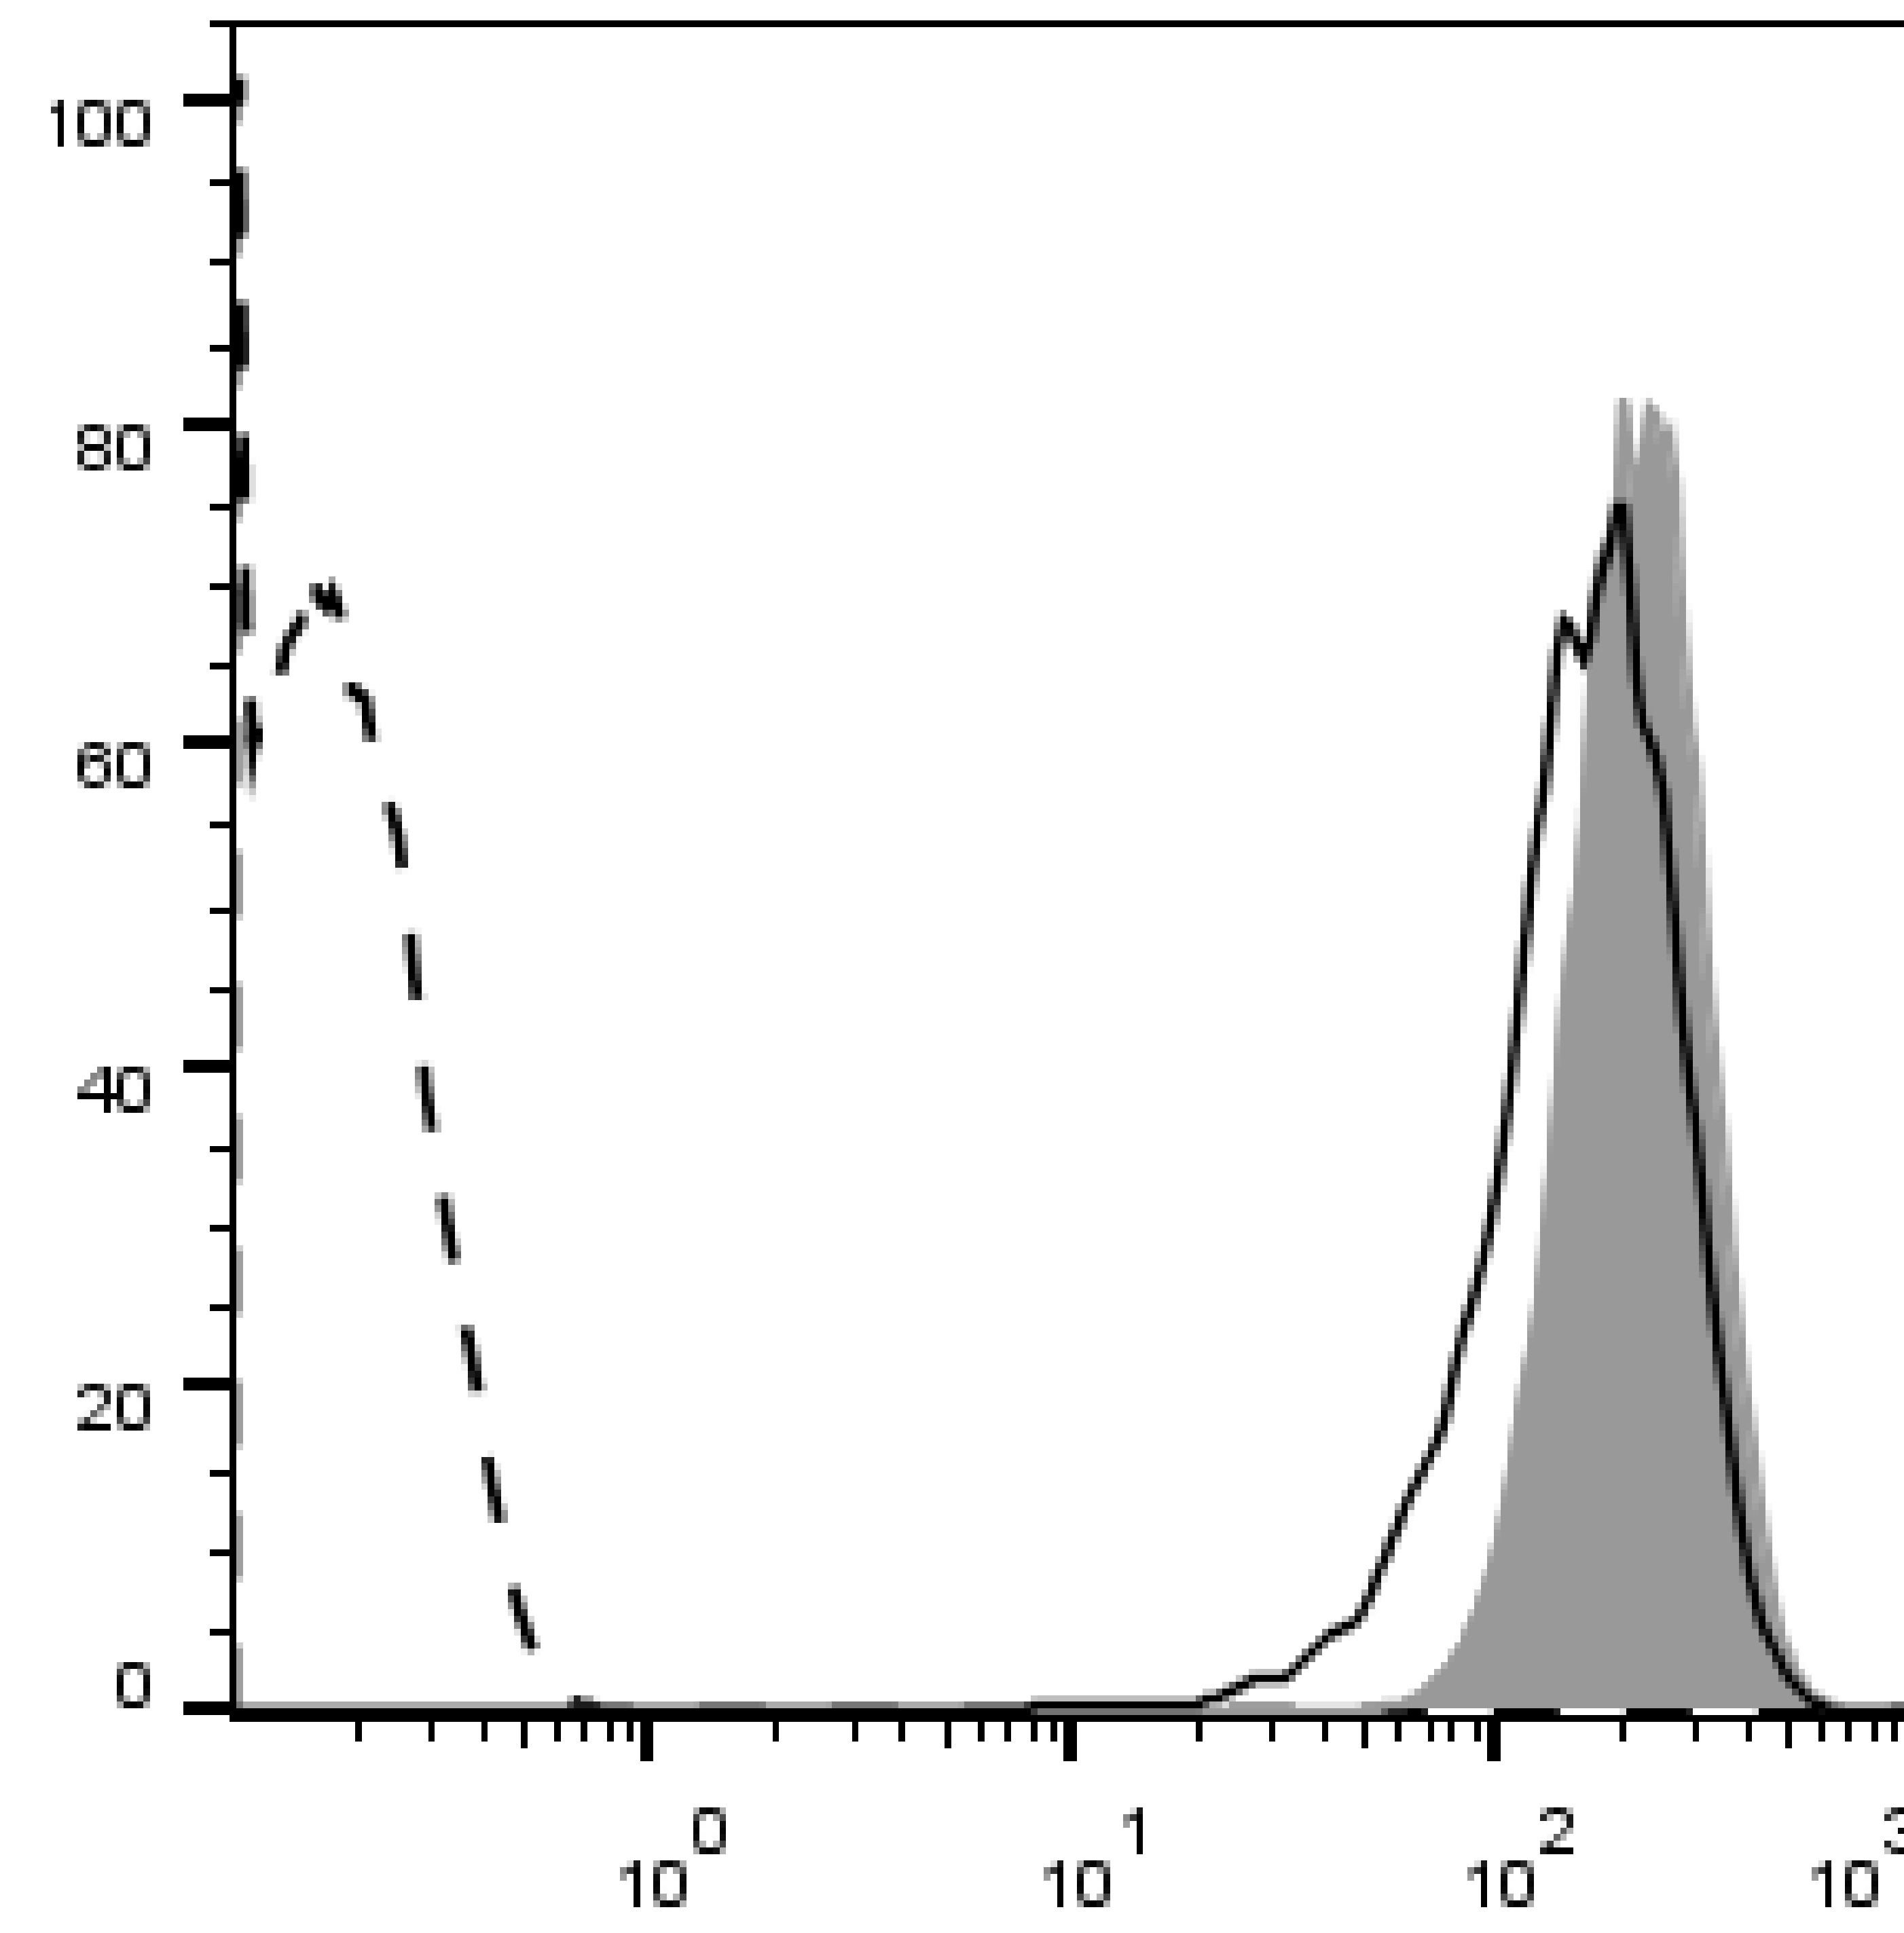

Abdi et al. Supplemental Figure 2
